# Supplementary material
Source: publisher figshare collection journal article supplement (https://tandf.figshare.com/ndownloader/files/36574055)
Supplement: Supplementary file 1 [file 36574055]

**Supplementary Table 2** The frequency table for the nationality

|  | Frequency | Percent | Cumulative Percent |
| --- | --- | --- | --- |
| Turkey | 126 | 46.0 | 46.0 |
| Saudi Arabia | 61 | 22.3 | 68.2 |
| India | 20 | 7.3 | 75.5 |
| Iran | 15 | 5.5 | 81.0 |
| Tunisia | 9 | 3.3 | 84.3 |
| Italy | 6 | 2.2 | 86.5 |
| Israel | 5 | 1.8 | 88.3 |
| china | 4 | 1.5 | 89.8 |
| Spain | 4 | 1.5 | 91.2 |
| Lebanon | 3 | 1.1 | 92.3 |
| Portugal | 3 | 1.1 | 93.4 |
| USA | 3 | 1.1 | 94.5 |
| Greece | 2 | .7 | 95.3 |
| Kuwait | 2 | .7 | 96.0 |
| Argentina | 1 | .4 | 96.4 |
| Bangladesh | 1 | .4 | 96.7 |
| Bosnia | 1 | .4 | 97.1 |
| Egypt | 1 | .4 | 97.4 |
| Germany | 1 | .4 | 97.8 |
| Korea | 1 | .4 | 98.2 |
| Mexico | 1 | .4 | 98.5 |
| Norway | 1 | .4 | 98.9 |
| Pakistan | 1 | .4 | 99.3 |
| Qatar | 1 | .4 | 99.6 |
| UAE | 1 | .4 | 100.0 |
| Total | 274 | 100.0 |  |
